# Supplementary material for: Functional type 1 regulatory T cells develop regardless of FOXP3 mutations in patients with IPEX syndrome
Source: PubMed Central journal article supplement (PMC3107421; doi:10.1002/eji.201040909), 2011-01-14
Supplement: eji0041-1120-SD1.pdf [file eji0041-1120-SD1.pdf]

**Supplemental Table 1. Cytokine production profile of Tr1 cell clones of donor origin.**

| Clone         | IL-2<br>pg/ml | IL-4<br>pg/ml | IL-5<br>ng/ml | IL-10<br>ng/ml | IFN $\gamma$<br>pg/ml | IL-10/IL-4<br>ratio |
|---------------|---------------|---------------|---------------|----------------|-----------------------|---------------------|
| 50            | 665           | 0             | 13,3          | 2,7            | 0                     | >100                |
| 73            | 775           | 0             | 0             | 0,5            | 0                     | >100                |
| 76            | 1005          | 0             | 16,6          | 2,6            | 0                     | >100                |
| 80            | 75            | 60            | 10,0          | 2,0            | 0                     | 34                  |
| 103           | 0             | 0             | 0             | 0,6            | 0                     | >100                |
| 154           | 10            | 0             | 5,6           | 4,0            | 0                     | >100                |
| 184           | 0             | 0             | 0             | 6,2            | 425                   | >100                |
| 262           | 30            | 100           | NT            | 6,5            | NT                    | 65                  |
| Mean $\pm$ SE | 320 $\pm$ 149 | 20 $\pm$ 14   | 6,5 $\pm$ 2,0 | 3,1 $\pm$ 0,8  | 61 $\pm$ 61           |                     |

NT: not tested

SE: standard error

activation: anti-CD3 (10 $\mu$ g/ml) plus anti-CD28 (1  $\mu$ g/ml) mAbs
