# Supplementary material for: Functional type 1 regulatory T cells develop regardless of FOXP3 mutations in patients with IPEX syndrome
Source: PubMed Central journal article supplement (PMC3107421; doi:10.1002/eji.201040909), 2011-01-14
Supplement: eji0041-1120-SD2.pdf [file eji0041-1120-SD2.pdf]

**Supplemental Table 2. Cytokine production profile of Tr1 cell clones of host origin.**

| Clone         | IL-2<br>pg/ml | IL-4<br>pg/ml | IL-5<br>ng/ml | IL-10<br>ng/ml | IFN $\gamma$<br>ng/ml | IL-10/IL-4<br>ratio |
|---------------|---------------|---------------|---------------|----------------|-----------------------|---------------------|
| 6             | 0             | 45            | 3,1           | 3,3            | 0,5                   | 78                  |
| 15            | 0             | 0             | 7,6           | 0,5            | 0,5                   | >100                |
| 18            | 0             | 0             | 24,8          | 3,0            | 2,6                   | >100                |
| 25            | 645           | 80            | 2,8           | 14,9           | 1,2                   | >100                |
| 39            | 60            | 0             | 0,4           | 1,6            | 0                     | >100                |
| 138           | 0             | 240           | 8,8           | 11,2           | 2,6                   | 47                  |
| 149           | 0             | 0             | 0             | 1,4            | 0,03                  | >100                |
| 183           | 0             | 0             | 3,7           | 0,5            | 0                     | >100                |
| 198           | 25            | 125           | 35,8          | 11,4           | 0,2                   | 93                  |
| 289           | 0             | 125           | NT            | 8,5            | NT                    | 68                  |
| 292           | 0             | 125           | NT            | 8,1            | NT                    | 65                  |
| Mean $\pm$ SE | 66 $\pm$ 58   | 67 $\pm$ 24   | 9,7 $\pm$ 4,1 | 5,9 $\pm$ 1,5  | 0,8 $\pm$ 0,4         |                     |

NT: not tested

SE: standard error

activation: anti-CD3 (10 $\mu$ g/ml) plus anti-CD28 (1  $\mu$ g/ml) mAbs
