# Supplementary material for: Functional type 1 regulatory T cells develop regardless of FOXP3 mutations in patients with IPEX syndrome
Source: PubMed Central journal article supplement (PMC3107421; doi:10.1002/eji.201040909), 2011-01-14
Supplement: eji0041-1120-SD3.pdf [file eji0041-1120-SD3.pdf]

**Supplemental Table 3. Suppressive activity of Tr1 cell clones of host and donor origin.**

| Tr1 clone | origin | % suppression<br>(mean $\pm$ SE <sup>a</sup> ,) | <i>FOXP3</i> <sup>c</sup> |
|-----------|--------|-------------------------------------------------|---------------------------|
| 73        | Donor  | 82 $\pm$ 6 (n=2) <sup>b</sup>                   | WT <sup>d</sup>           |
| 103       | Donor  | 48 $\pm$ 13 (n=3)                               | WT                        |
| 154       | Donor  | 35 $\pm$ 8 (n=3)                                | WT                        |
| 6         | Host   | 18 $\pm$ 6 (n=2)                                | Mut <sup>e</sup>          |
| 18        | Host   | 11 $\pm$ 3 (n=2)                                | Mut                       |
| 25        | Host   | 59 $\pm$ 17 (n=3)                               | Mut                       |
| 39        | Host   | 10 $\pm$ 3 (n=2)                                | Mut                       |
| 149       | Host   | 52 $\pm$ 15 (n=3)                               | Mut                       |

a) SE: standard error; b) the suppressive activity of Tr1 cell clones was evaluated in *n* independent experiments, as indicated; c) presence or absence of the mutation was evaluated by DNA sequence analysis of the *FOXP3* gene; d) WT: wild type; e) Mut: mutated.
