# Supplementary material for: Functional type 1 regulatory T cells develop regardless of FOXP3 mutations in patients with IPEX syndrome
Source: PubMed Central journal article supplement (PMC3107421; doi:10.1002/eji.201040909), 2011-01-14
Supplement: eji0041-1120-SD7.pdf [file eji0041-1120-SD7.pdf]

# European Journal of Immunology

**Supporting Information**

**for**

**DOI 10.1002/eji.201040909**

**Functional type 1 regulatory T cells develop regardless of *FOXP3* mutations in patients with IPEX syndrome**

Laura Passerini, Sara Di Nunzio, Silvia Gregori, Eleonora Gambineri,  
Massimiliano Cecconi, Markus G. Seidel, Gianantonio Cazzola, Lucia Perroni,  
Alberto Tommasini, Silvia Vignola, Luisa Guidi, Maria G. Roncarolo  
and Rosa Bacchetta
